# Supplementary material for: A Multi-cohort Study of the Prognostic Significance of Microsatellite Instability or Mismatch Repair Status after Recurrence of Resectable Gastric Cancer
Source: PubMed Central journal article supplement — Cancer Res Treat. 2020 May 4;52(4):1153–61. doi: 10.4143/crt.2020.173 (PMC7577808; doi:10.4143/crt.2020.173), 2020-05-04
Supplement: crt-2020-173-suppl2.pdf [file crt-2020-173-suppl2.pdf]

**S2 Table.** Type of tumor recurrence according to MSI/MMR status

| Type of recurrence | MSS/pMMR (n=726) | MSI-H/dMMR (n=64) | p-value |
|--------------------|------------------|-------------------|---------|
| Locoregional       | 121 (16.7)       | 11 (17.2)         | 0.816   |
| Hematogenous       | 143 (19.7)       | 11 (17.2)         |         |
| Peritoneum         | 311 (42.8)       | 25 (39.1)         |         |
| Any combination    | 127 (17.5)       | 15 (23.4)         |         |
| Krukenberg only    | 24 (3.3)         | 2 (3.1)           |         |

Values are presented as number (%). MSI, microsatellite instability; MMR, mismatch repair; MSS, microsatellite stable; pMMR, proficient mismatch repair; MSI-H, microsatellite instability high; dMMR, deficient mismatch repair.
