# Supplementary material for: A Multi-cohort Study of the Prognostic Significance of Microsatellite Instability or Mismatch Repair Status after Recurrence of Resectable Gastric Cancer
Source: PubMed Central journal article supplement — Cancer Res Treat. 2020 May 4;52(4):1153–61. doi: 10.4143/crt.2020.173 (PMC7577808; doi:10.4143/crt.2020.173), 2020-05-04
Supplement: crt-2020-173-suppl5.pdf [file crt-2020-173-suppl5.pdf]

**A**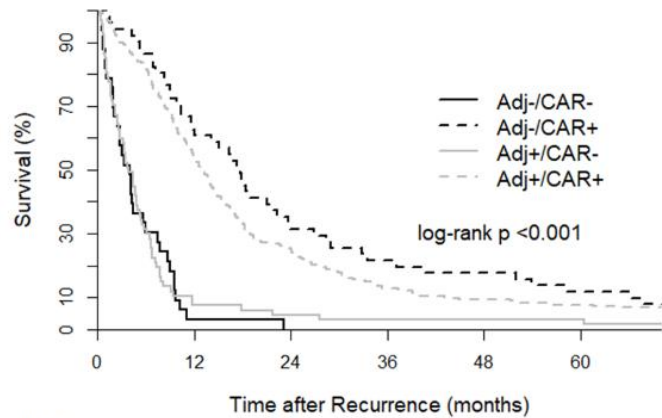

| Number at risk | 0   | 12  | 24 | 36 | 48 | 60 |
|----------------|-----|-----|----|----|----|----|
| Adj-/CAR-      | 33  | 1   | 0  | 0  | 0  | 0  |
| Adj-/CAR+      | 51  | 32  | 16 | 11 | 9  | 6  |
| Adj+/CAR-      | 67  | 5   | 3  | 2  | 2  | 2  |
| Adj+/CAR+      | 282 | 153 | 71 | 36 | 24 | 17 |

**B**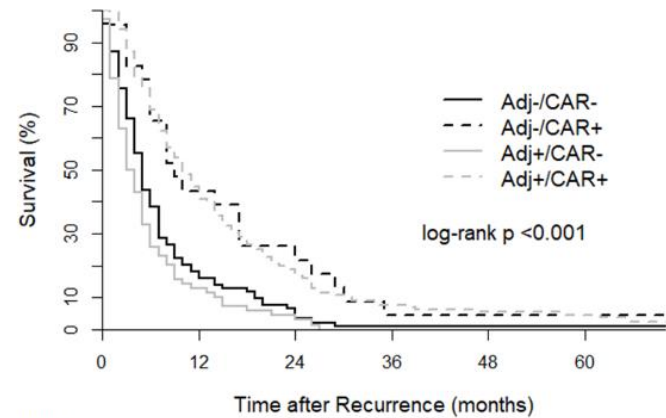

| Number at risk | 0   | 12 | 24 | 36 | 48 | 60 |
|----------------|-----|----|----|----|----|----|
| Adj-/CAR-      | 94  | 17 | 6  | 1  | 1  | 1  |
| Adj-/CAR+      | 23  | 10 | 6  | 1  | 1  | 1  |
| Adj+/CAR-      | 71  | 9  | 3  | 0  | 0  | 0  |
| Adj+/CAR+      | 133 | 59 | 25 | 10 | 7  | 6  |

**S5 Fig.** Kaplan-Meier curves with log-rank test for survival after recurrence according to the status of receiving adjuvant chemotherapy and chemotherapy after recurrence in the Y-cohort (A) and in the S-cohort (B). Adj, adjuvant chemotherapy; CAR, chemotherapy after recurrence; n, number of patients. In the subgroup analysis of MSS/pMMR tumors, a similar finding was observed in the overall cohort (log-rank  $p < 0.001$ ) (Table 4, Fig. 1B) and each cohort (log-rank  $p < 0.001$  and  $p < 0.001$  in the Y-cohort and S-cohort, respectively) (S6A and S6B Fig.).
